# Supplementary figures and images for: Fungal Endophyte Communities of Three Agricultural Important Grass Species Differ in Their Response Towards Management Regimes
Source: MDPI journal article supplement (doi:10.3390/microorganisms7020037), 2019-01-27

(a)

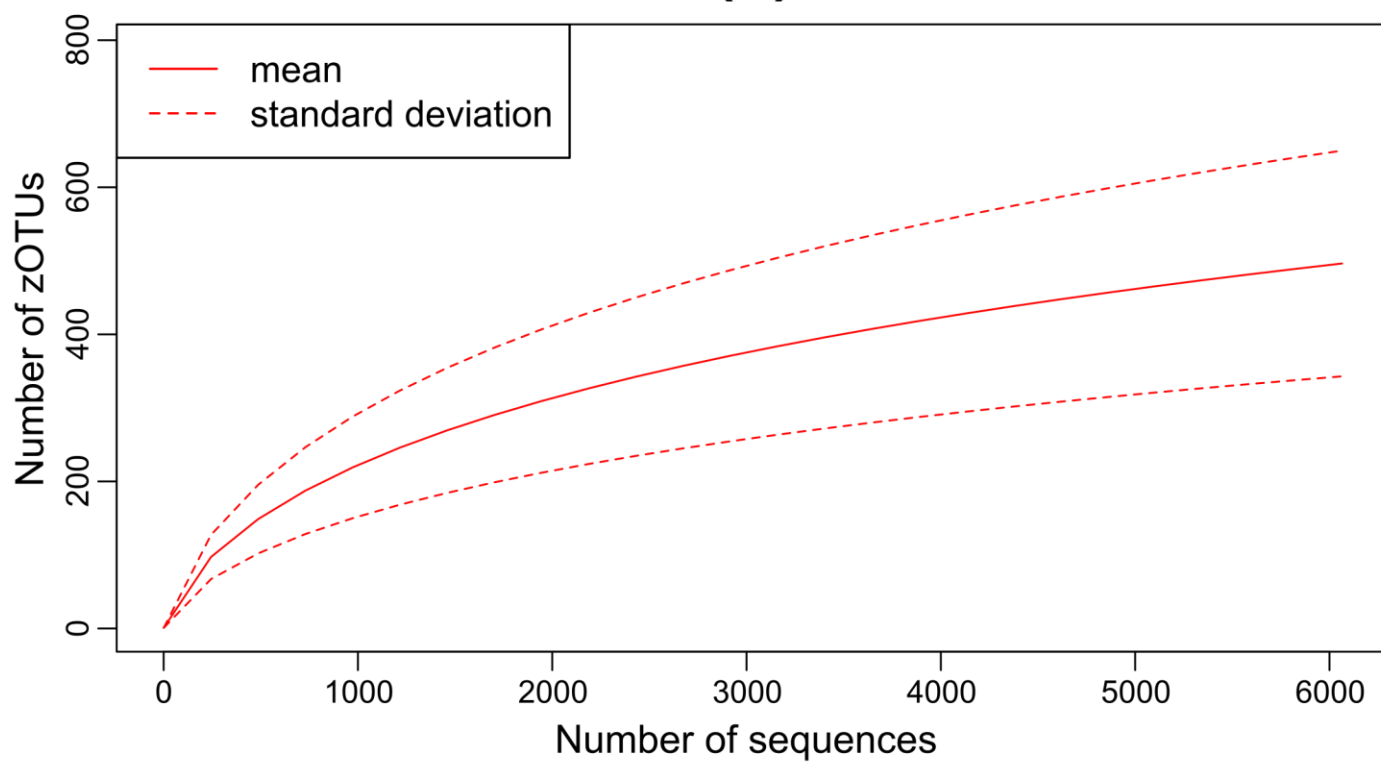

(b)

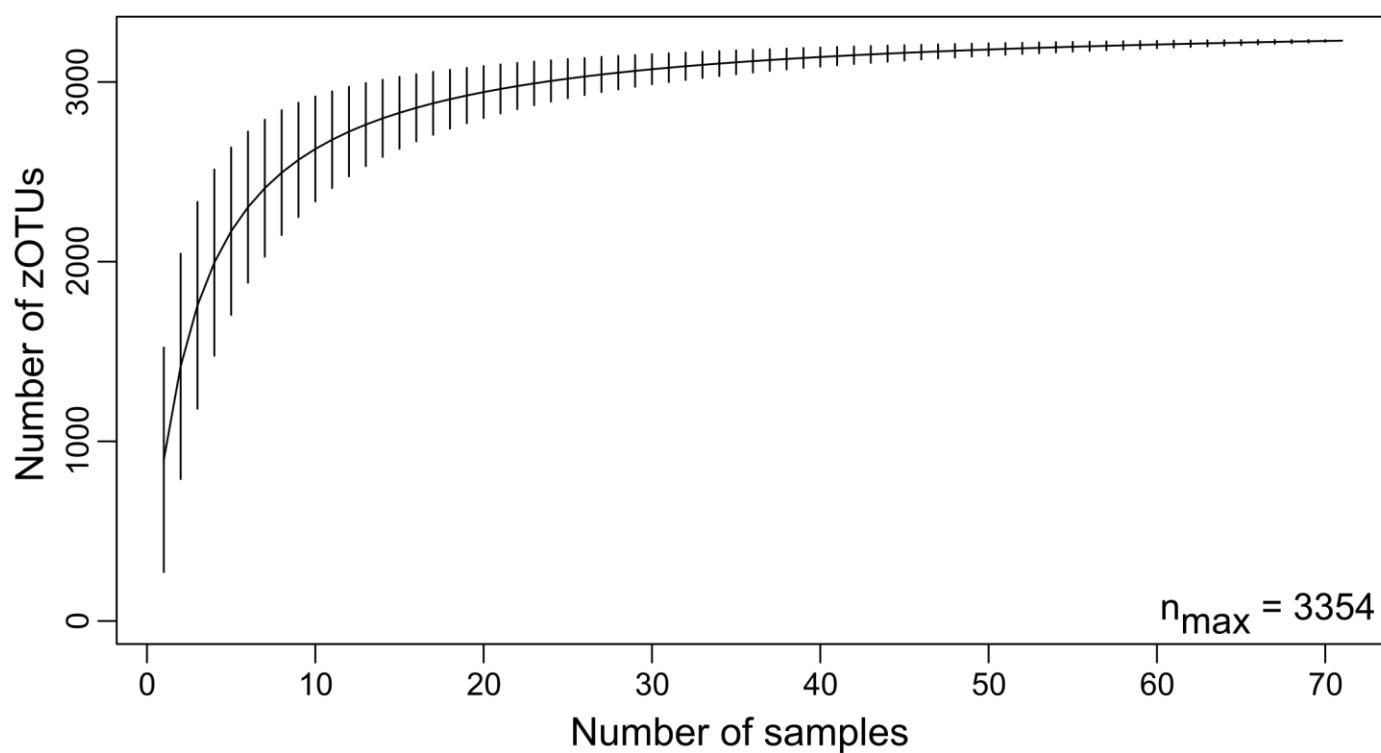

**Supplementary Figure S1.** Rarefaction (A) and species accumulation (B) curves.

Supplement: s1 [file s1]
